# Supplementary material for: Sensitivity of brain MRI and neurological examination for detection of upper motor neurone degeneration in amyotrophic lateral sclerosis
Source: PubMed Central journal article supplement (PMC8685620; doi:10.1136/jnnp-2021-327269), 2021-10-18
Supplement: jnnp-2021-327269supp002.pdf [file jnnp-2021-327269supp002.pdf]

**Supplemental table 3. Representative clinical example of UMN categories based on neurological examination in one patient.**

| Patient                                                                                                                                                                            | Body region  | Visit 1                                                           | Visit 2                                                                           | Category                               |
|------------------------------------------------------------------------------------------------------------------------------------------------------------------------------------|--------------|-------------------------------------------------------------------|-----------------------------------------------------------------------------------|----------------------------------------|
| Woman, 69y,<br>first visit 3<br>months after<br>diagnosis, no<br>cognitive<br>deficits,<br>normal<br><i>C9orf72</i><br>repeat<br>length,<br>negative<br>family history<br>for MND. | Bulbar       | No dysarthria, normal<br>tongue movement,<br>one primitive reflex | No dysarthria,<br>normal tongue<br>movement, two<br>primitive reflexes            | Stable no/trace<br>UMN signs           |
|                                                                                                                                                                                    | Right<br>arm | Normal reflexes,<br>normal muscle tone                            | Pathologically brisk<br>biceps and triceps<br>reflexes, normal<br>muscle tone     | Progressive UMN<br>signs               |
|                                                                                                                                                                                    | Left arm     | biceps reflex, normal<br>muscle tone                              | Pathologically brisk<br>biceps and triceps<br>reflexes, increased<br>muscle tone. | Stable<br>moderate/severe<br>UMN signs |
|                                                                                                                                                                                    | Right leg    | increased knee and<br>ankle reflexes,<br>spasticity               | Pathologically brisk<br>knee and ankle jerk<br>reflexes, spasticity               | Stable<br>moderate/severe<br>UMN signs |
|                                                                                                                                                                                    | Left leg     | knee and ankle jerk<br>reflexes, spasticity                       | Pathologically brisk<br>knee and ankle jerk<br>reflexes, spasticity               | Stable<br>moderate/severe<br>UMN signs |

**Supplemental table 3. Representative clinical example of UMN categories based on neurological examination in one patient.**

Categorisation of UMN signs per body region based on the neurological examination at two visits. The authors, not the examiner, defined which body region was in which category using the Devine score as a tool. For display purposes, we only show UMN categories here. LMN categories for this patient were: bulbar: progressive LMN signs, arm right: progressive LMN signs, arm left: stable moderate/severe LMN signs, both legs: stable moderate/severe LMN signs. Abbreviations: y = years, MND = motor neurone disease, UMN = upper motor neurone, LMN = lower motor neurone.
