# Supplementary material for: Sensitivity of brain MRI and neurological examination for detection of upper motor neurone degeneration in amyotrophic lateral sclerosis
Source: PubMed Central journal article supplement (PMC8685620; doi:10.1136/jnnp-2021-327269), 2021-10-18
Supplement: jnnp-2021-327269supp003.pdf [file jnnp-2021-327269supp003.pdf]

**Supplemental table 1. Used statistical test, R-packages, and formulae.**

| Statistical test                         | Function       | R-<br>package | Version | Formula                                                                                                                                                                              |
|------------------------------------------|----------------|---------------|---------|--------------------------------------------------------------------------------------------------------------------------------------------------------------------------------------|
| 1. Generalized linear model              | glm()          | stats         | 3.6.1   | MRI measurement ~ UMN group + age + sex + total brain volume + disease duration<br><br>MRI measurement ~ (UMN group * LMN group) + age + sex + total brain volume + disease duration |
| 2. Step-wise model selection calculation | step()         | stats         | 3.6.1   | MRI measurement ~ group + age + sex + handedness + <i>C9orf72</i> RE + total brain volume                                                                                            |
| 3. Spearman's rank correlation           | cor.test()     | stats         | 3.6.1   | ~ MRI measurement + group                                                                                                                                                            |
| 4. Kruskal-Wallis test                   | kruskal.test() | stats         | 3.6.1   | Demographic variable ~ group                                                                                                                                                         |
| 5. Linear mixed model                    | lmer()         | lmerTest      | 3.1.0   | ALSFRS-R-score ~ time between visits + (time between visits   ALS subject)<br><br>CT ~ age + sex + total brain volume + time between visits + (time between visits   ALS subject)    |

Devine score ~ age + sex + follow-up visits + (follow-up visits | ALS subject)

MRI measurement ~ category + age + sex + total brain volume + (1 | body region)

scale(MRI measurement) [or]  
scale(Devine score) ~ age + sex + time between visits + (time between visits | ALS subject)

|                 |      |       |       |                               |
|-----------------|------|-------|-------|-------------------------------|
| 6. Linear model | lm() | stats | 3.6.1 | thickness ~ group + age + sex |
|-----------------|------|-------|-------|-------------------------------|

---

### Supplemental table 1. Used statistical test, R-packages, and formulae.

For reproducibility reasons we show statistical formulae, functions and R-package versions, in order of appearance in Methods. Abbreviations: *C9orf72* RE = *C9orf72* repeat length expansion, ALSFRS-R = revised ALS functional rating scale, NA = not applicable.
