# Supplementary material for: Sensitivity of brain MRI and neurological examination for detection of upper motor neurone degeneration in amyotrophic lateral sclerosis
Source: PubMed Central journal article supplement (PMC8685620; doi:10.1136/jnnp-2021-327269), 2021-10-18

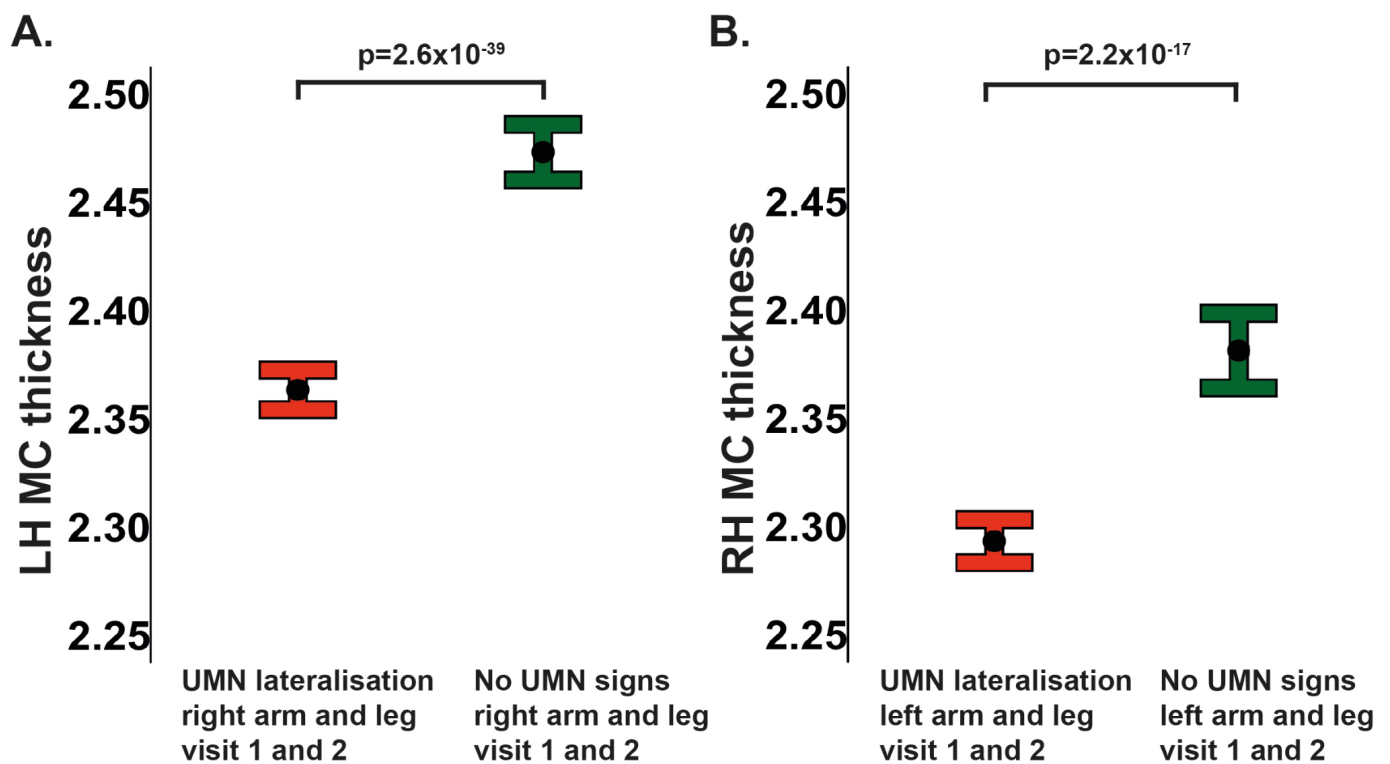

Supplement: jnnp-2021-327269supp004.pdf [file jnnp-2021-327269supp004.pdf]
